# Supplementary material for: Targeted apoptosis in ovarian cancer cells through mitochondrial dysfunction in response to Sambucus nigra agglutinin
Source: PubMed Central journal article supplement (PMC5520748; doi:10.1038/cddis.2017.77), 2017-05-04
Supplement: cddis201777x1.pdf [file cddis201777x1.pdf]

**Supplementary Information:**

**Targeted apoptosis in ovarian cancer cells through mitochondrial dysfunction in response to *Sambucus nigra* agglutinin**

**Running title: SNA mediates apoptosis through mitochondrial dysfunction**

Shreya Roy Chowdhury<sup>1</sup>, Upasana Ray<sup>1</sup>, B. P. Chatterjee<sup>2</sup> and Sib Sankar Roy<sup>1\*</sup>

<sup>1</sup>Cell Biology and Physiology Division, CSIR-Indian Institute of Chemical Biology, Council of Scientific and Industrial Research, 4 Raja S. C. Mullick Road, Kolkata 700032, India.

<sup>2</sup>Department of Natural Sciences, West Bengal University of Technology, Salt Lake, Kolkata, 700064, India.

\*Correspondence:

Mailing address: Cell Biology and Physiology Division,  
CSIR-Indian Institute of Chemical Biology,  
4 Raja S. C. Mullick Road,  
Kolkata 700032, India.

Tel : + 91-33-2499-5858

Fax : + 91-33-2473-5197

Email: [sibsankar@iicb.res.in](mailto:sibsankar@iicb.res.in)

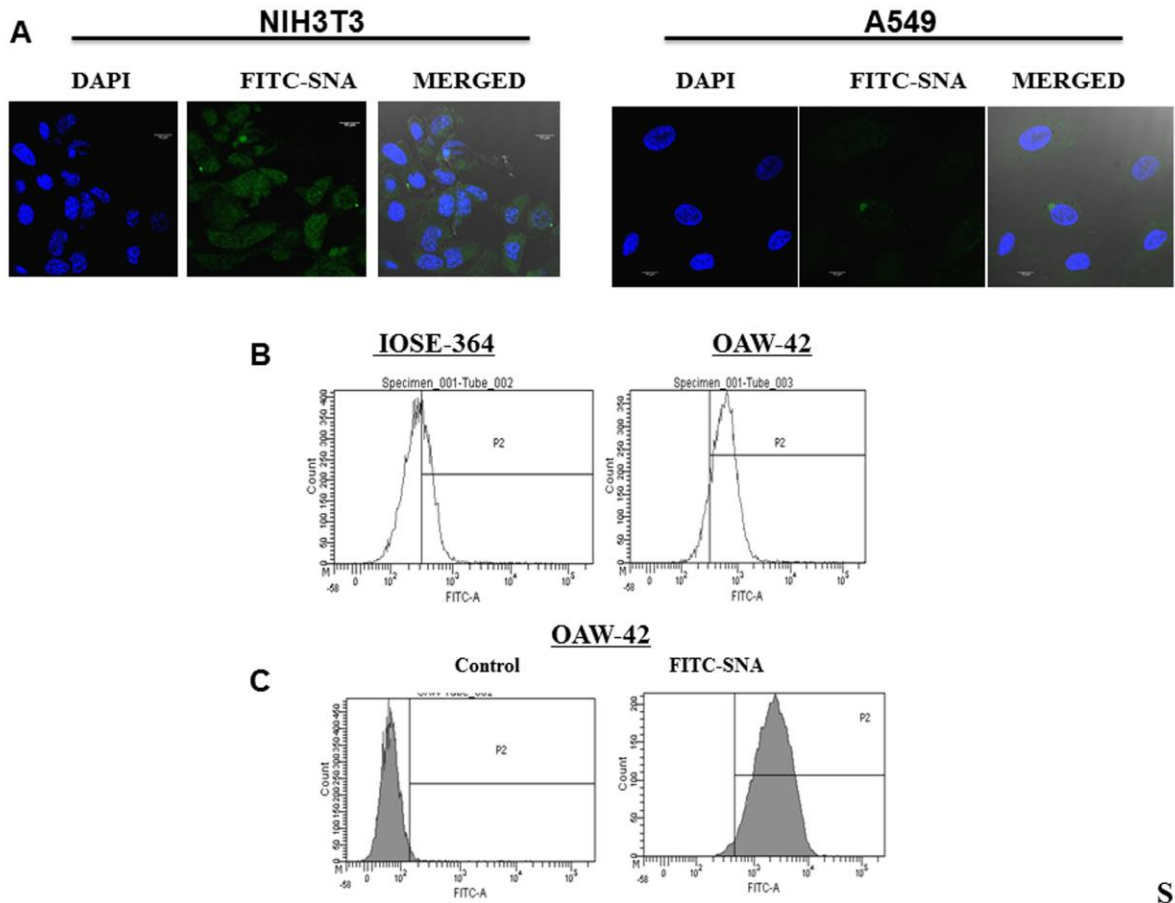

S1

**Supplementary Figure Legends:**

S1: OC cells are associated with enhanced sialylation. (A) Confocal microscopy of NIH3T3 and A549 cells stained with DAPI and FITC-SNA. Scale bar = 10µm. (B) Quantitation of FITC-SNA binding by flow cytometry in IOSE-364 and OAW-42 cells. (C) Surface binding of SNA was quantitated by Flow-cytometry in OAW42 cell lines.

## OAW-42

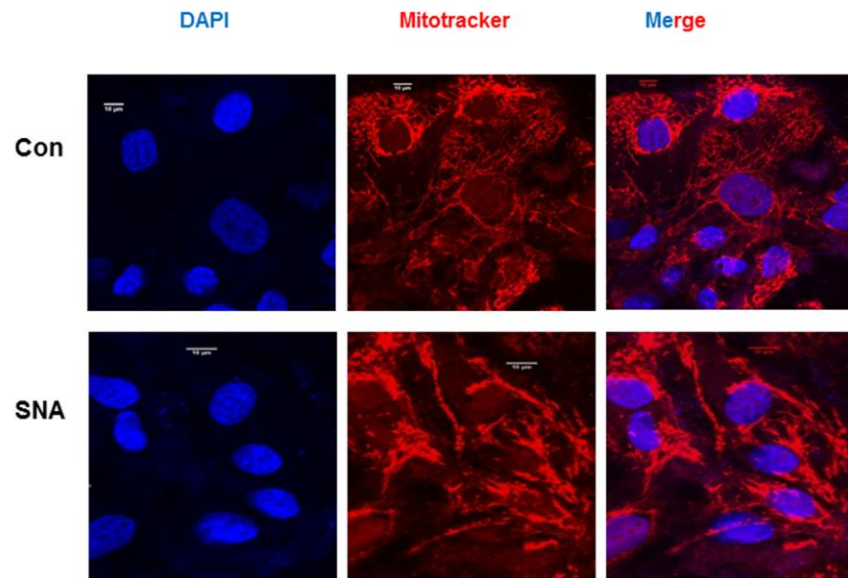

S2

S2: SNA treatment led to fragmented mitochondrial morphology in OAW-42 cells. OAW-42 cells were stained with MitoTracker Red CMXRos and imaged for mitochondrial morphology by confocal imaging. Scale bar represents 10  $\mu\text{m}$ .

### OAW-42

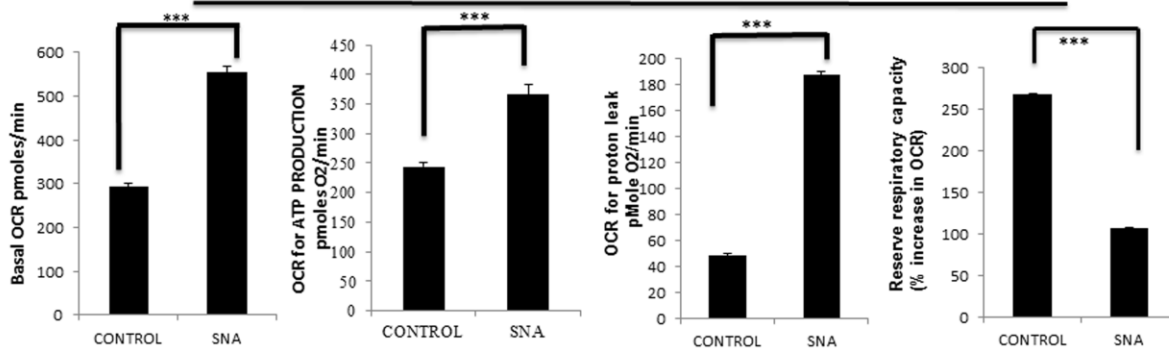

S3

S3: SNA-treated OC cells exhibited shift in cellular bioenergetics. Oxygen Consumption Rate (OCR) was measured in SNA-treated OAW-42 cells by extracellular flux analyzer (Seahorse Bioscience). The data shown here are mean  $\pm$ SEM for three experiments performed independently.
